# Supplementary material for: A few-shot learning framework for the diagnosis of osteopenia and osteoporosis using knee X-ray images
Source: PubMed Central journal article supplement — J Int Med Res. 2024 Sep 3;52(9):03000605241274576. doi: 10.1177/03000605241274576 (PMC11375658; doi:10.1177/03000605241274576), 2024-09-03
Supplement: sj-pdf-1-imr-10.1177_03000605241274576.pdf [file sj-pdf-1-imr-10.1177_03000605241274576.pdf]

**Supplementary Table 1 Characteristics of Participants from Jintan Affiliated Hospital to Jiangsu University**

| <b>Variables</b>          | <b>Control</b> | <b>Osteopenia</b> | <b>Osteoporosis</b> |
|---------------------------|----------------|-------------------|---------------------|
| Num. of subjects          | 82             | 94                | 115                 |
| Sex (female, n)           | 48             | 52                | 71                  |
| Age (years)               | 64.7 ± 12.1    | 68.1 ± 11.7       | 69.0 ± 12.5         |
| Diabetes, n (%)           | 22 (26.8)      | 27 (28.7)         | 38 (33.0)           |
| Hypertension, n (%)       | 35 (42.7)      | 44 (46.8)         | 53 (46.1)           |
| BMI (kg/m <sup>2</sup> )  | 22.5 ± 3.9     | 23.4 ± 4.4        | 24.3 ± 4.6          |
| FBMD (g/cm <sup>2</sup> ) | 0.79 ± 0.08    | 0.71 ± 0.07       | 0.62 ± 0.09         |
| LBMD (g/cm <sup>2</sup> ) | 1.02 ± 0.13    | 0.83 ± 0.12       | 0.74 ± 0.09         |

Data are mean ± standard deviation for continuous variables. BMI, body mass index; FBMD: femoral bone mineral density; LBMD: lumbar bone mineral density.

**Supplementary Table 2 Characteristics of Participants from the First Affiliated Hospital of Soochow University**

| <b>Variables</b>          | <b>Control</b> | <b>Osteopenia</b> | <b>Osteoporosis</b> |
|---------------------------|----------------|-------------------|---------------------|
| Num. of subjects          | 203            | 203               | 203                 |
| Sex (female, n)           | 119            | 123               | 125                 |
| Age (years)               | 65.3 ± 11.5    | 66.0 ± 12.5       | 68.5 ± 12.1         |
| Diabetes, n (%)           | 43 (21.2)      | 77 (37.9)         | 82 (40.4)           |
| Hypertension, n (%)       | 89 (43.8)      | 101 (49.8)        | 112 (55.2)          |
| BMI (kg/m <sup>2</sup> )  | 23.2 ± 3.3     | 24.7 ± 4.6        | 24.9 ± 4.9          |
| FBMD (g/cm <sup>2</sup> ) | 0.77 ± 0.09    | 0.70 ± 0.08       | 0.61 ± 0.09         |
| LBMD (g/cm <sup>2</sup> ) | 1.01 ± 0.11    | 0.81 ± 0.09       | 0.72 ± 0.08         |

Data are mean ± standard deviation for continuous variables. BMI, body mass index; FBMD: femoral bone mineral density; LBMD: lumbar bone mineral density.
